# Supplementary material for: Low Serum Vitamin D Is Associated with Anti-Thyroid Peroxidase Antibody in Autoimmune Thyroiditis
Source: PubMed Central journal article supplement — Yonsei Med J. 2014 Feb 10;55(2):476–81. doi: 10.3349/ymj.2014.55.2.476 (PMC3936621; doi:10.3349/ymj.2014.55.2.476), 2014-02-10
Supplement: ymj-55-476-s001.pdf [file ymj-55-476-s001.pdf]

**Supplementary Table 1. Seasonal Variation of 25(OH)D<sub>3</sub>**

| Season | 25(OH)D <sub>3</sub> (ng/mL) | <i>p</i> value* |
|--------|------------------------------|-----------------|
| Spring | 13.73±6.83                   | Not significant |
| Summer | 14.80±7.10                   |                 |
| Fall   | 15.61±6.19                   |                 |
| Winter | 12.12±6.22                   |                 |

25(OH)D<sub>3</sub>, serum 25-hydroxy-vitamin D<sub>3</sub>.

\*One-way analysis of variance.
